# Supplementary material
Source: MDPI journal article supplement (https://www.mdpi.com/2073-4344/9/11/885)
Supplement: s1 [file s1]

**Selective catalytic transfer hydrogenolysis of glycerol to 2-isopropoxy-  
propan-1-ol over noble metal ion-exchanged mordenite**

**Bhupendra Kumar Singh, Yongseok Kim, Seungdon Kwon and Kyungsu Na\***

Department of Chemistry, Chonnam National University, 77 Yongbong-ro, Buk-gu,  
Gwangju 61186, Republic of Korea

\*Correspondence: kyungsu\_na@chonnam.ac.kr; Tel.: +82-62-530-3494

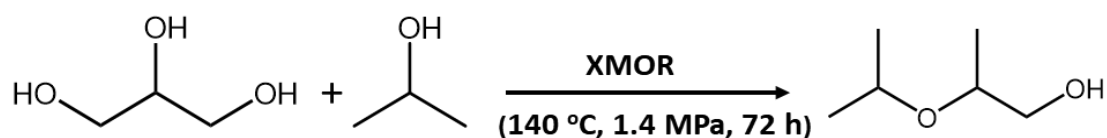

**Figure S1.** Schematic representation of catalytic transfer hydrogenolysis (CTH) conversion of glycerol to 2-isopropoxy-propan-1-ol in the presence of propan-2-ol over noble metal ion-exchanged mordenite (XMOR, where X denotes noble metals; Ru, Rh, and Pd).

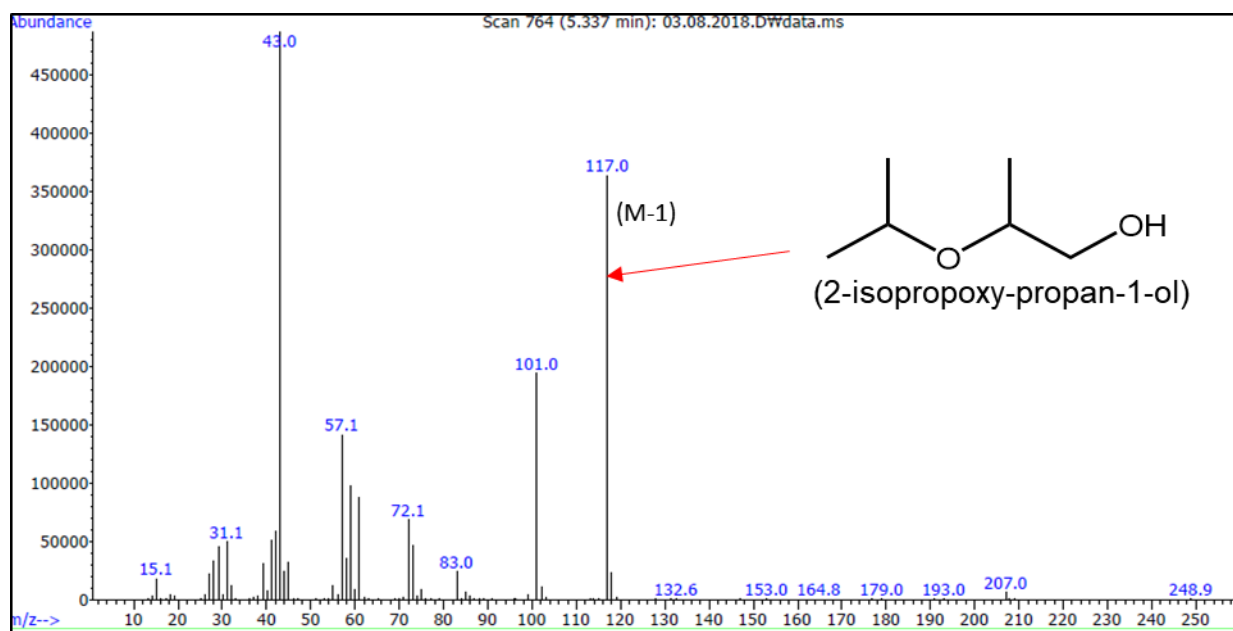

**Figure S2.** GCMS spectrum of 2-isopropoxy-propan-1-ol ( $M_w = 118.17$ ) obtained after CTH conversion of glycerol in the presence of propan-2-ol over XMOR (X= Ru, Pd, and Rh). The strong peak present at  $m/z$  117 (M-1 peak) firmly corroborates the synthesis of 2-isopropoxy-propan-1-ol.

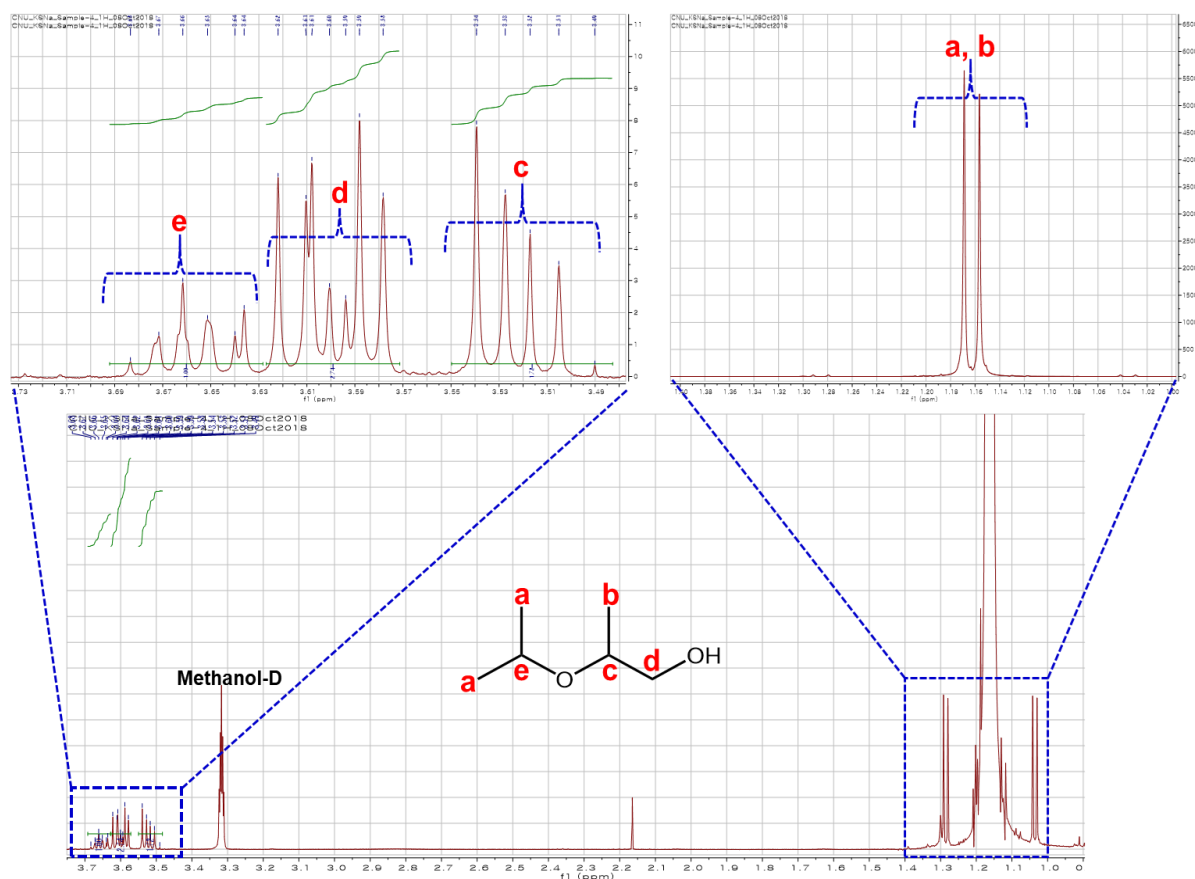

**Figure S3.** <sup>1</sup>H NMR spectra of resultant solution after CTH reaction of glycerol in the presence of **propan-2-ol**. The spectra were obtained in deuterated methanol. Synthesis of the product (2-isopropoxy-**propan-1-ol**) is confirmed by the peak pattern and corresponding chemical shifts. The analyzed compound also contains unreacted glycerol and **propan-2-ol** after the reaction; therefore, the signature peaks of **propan-2-ol** are merged with the product peaks (peaks **a** and **b**), and the peaks of unreacted glycerol may overlap with peaks **c**, **d**, and **e**. In order to confirm product formation, we also analyzed the <sup>1</sup>H NMR spectra of the reactants (glycerol and **propan-2-ol** in deuterated methanol; **Figure S4**). The results clearly show differences in the intensity of the proton peaks at the corresponding chemical shifts.

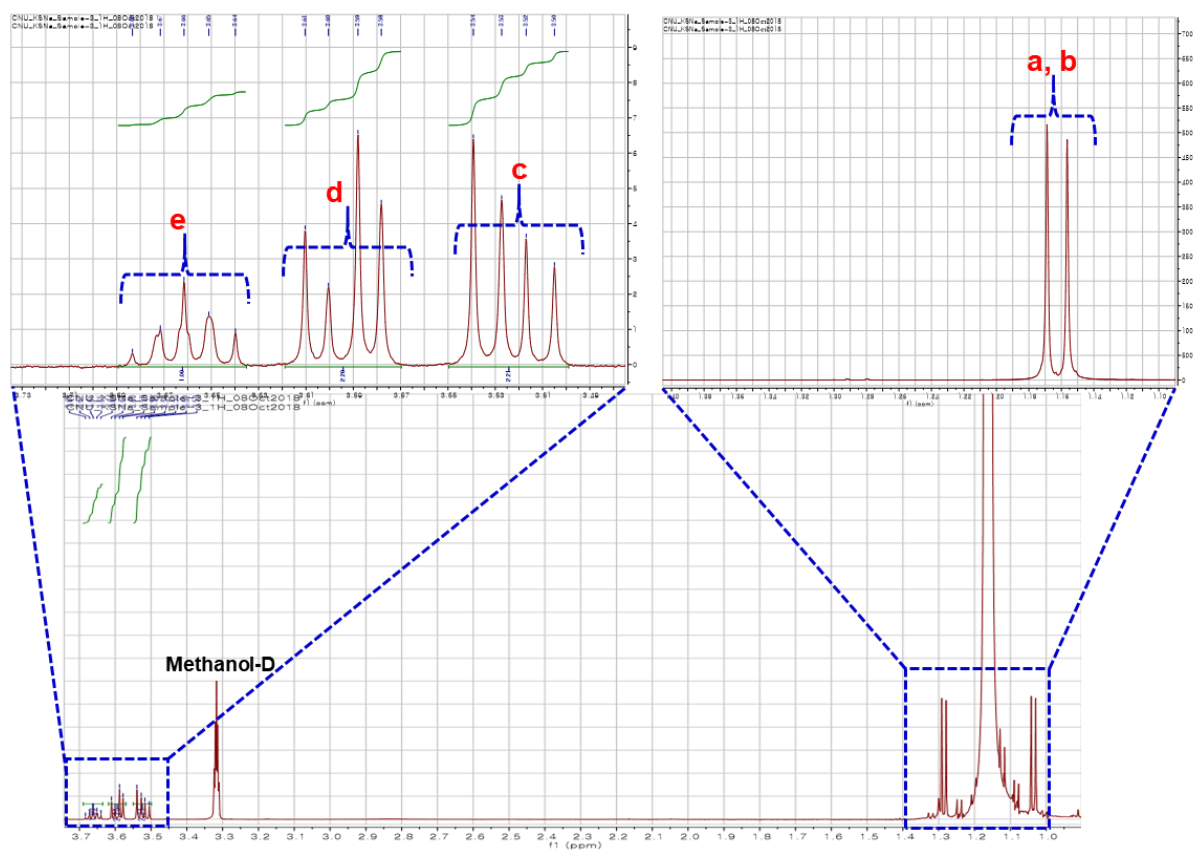

**Figure S4.**  $^1\text{H}$  NMR spectra of the starting reaction mixture (glycerol, propan-2-ol). The spectrum was obtained in deuterated methanol. The peaks **a** and **b** represent the signature peaks of propan-2-ol. Whereas, the peaks **c**, **d**, and **e** correspond to the signature peaks of glycerol.

**Table S1.** Properties of NaMOR(cal), RuMOR(cal), RhMOR(cal) and PdMOR(cal) catalysts.

| S. No. | Catalyst type | BET surface area<br>(m <sup>2</sup> /g) | Chemical composition (ICP-OES) |                             |
|--------|---------------|-----------------------------------------|--------------------------------|-----------------------------|
|        |               |                                         | Si/Al                          | Noble metal content (mg/kg) |
| 1      | NaMOR(cal)    | 138.29                                  | 6.87                           | --                          |
| 2      | RuMOR(cal)    | 358.4                                   | 6.82                           | 0.10                        |
| 3      | RhMOR(cal)    | 36.74                                   | 6.75                           | 0.21                        |
| 4      | PdMOR(cal)    | 20.09                                   | 6.53                           | 0.37                        |
